# Supplementary material for: Progressive Photoreceptor Dysfunction and Age-Related Macular Degeneration-Like Features in rp1l1 Mutant Zebrafish
Source: PubMed Central journal article supplement (PMC7600334; doi:10.3390/cells9102214), 2020-09-30
Supplement: cells-09-02214-s001.pdf [file cells-09-02214-s001.pdf]

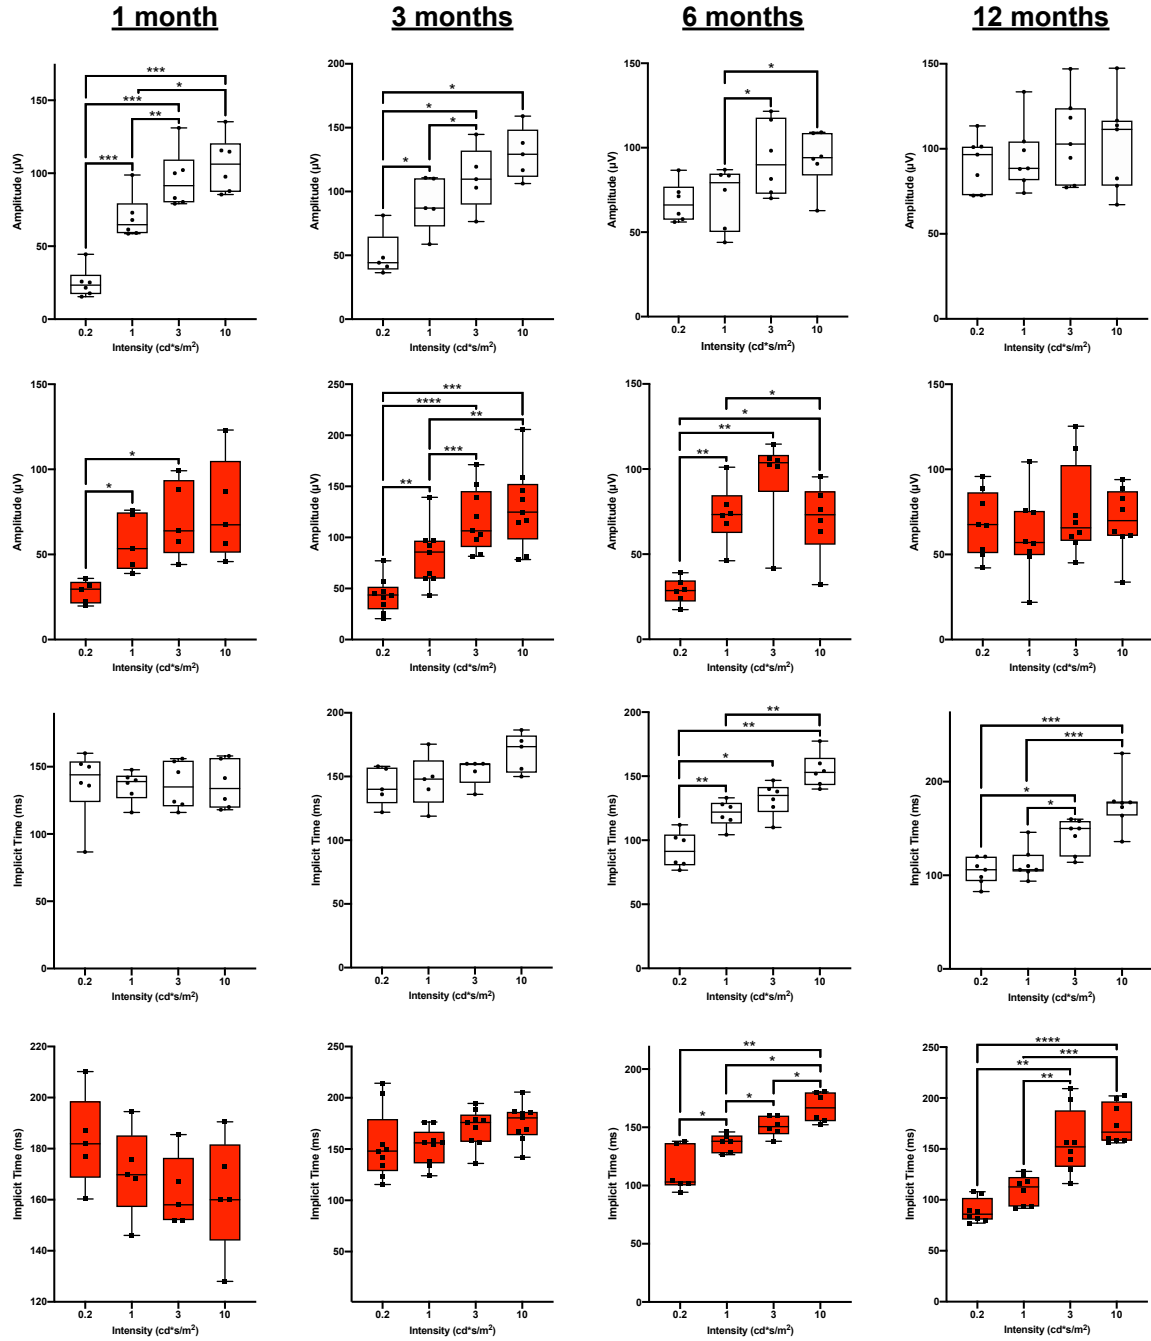

**Figure S2:** Differences between stimulus responses for b-wave amplitude and implicit time for each group, analyzed using repeated-measures ANOVA. Wild-type in white; mutants in red. \* $p < 0.05$ ; \*\* $p < 0.01$ ; \*\*\* $p < 0.001$ ; \*\*\*\* $p < 0.0001$ .
